# Supplementary material for: Accurate, scalable, and unified single-cell atlas integration with scBIOT
Source: Research Square preprint supplement (doi:10.21203/rs.3.rs-8310482/v1), 2026-01-19
Supplement: Supplementary file 1 [file 9ebd8f8c8e61ab6f645daa2e.pdf]

# Accurate, scalable, and unified single-cell atlas integration with scBIOT

Haihui Zhang<sup>1,2\*</sup>, Peiwu Qin<sup>3</sup>

<sup>1</sup>Department of Orofacial Sciences, School of Dentistry, University of California San Francisco, San Francisco, CA

<sup>2</sup>Cancer Biology and Immunology Laboratory, University of California San Francisco, San Francisco, CA

<sup>3</sup>Institute of Biopharmaceutical and Health Engineering, Shenzhen International Graduate School, Tsinghua University, Shenzhen, Guangdong, China

\*Correspondence should be addressed to Haihui Zhang ([Haihui.Zhang@ucsf.edu](mailto:Haihui.Zhang@ucsf.edu)).

**Keywords:** scBIOT, Optimal transport, Generative model, Transformer, VAE, Self-supervised learning, Contrastive learning, Multi-omics, Single-cell integration

## Extended Data

**Extended Data Fig. 1**

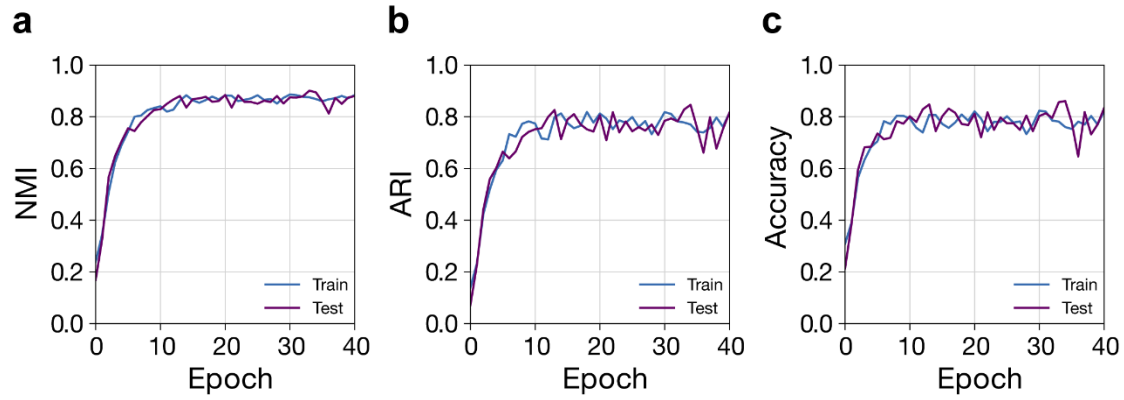

**Extended Data Fig. 1. Benchmarking clustering metrics against OT-derived pseudo-labels.**

**a**, Normalized mutual information (NMI) between model-inferred clusters and pseudo-labels generated via optimal transport (OT). **b**, Adjusted Rand index (ARI), measuring similarity between pseudo-labels and predicted labels. **c**, Classification accuracy, the fraction of cells whose predicted labels match the OT pseudo-labels. Across panels, higher values indicate greater concordance with the OT reference.

Extended Data Fig. 2

| Method       | Bio conservation |            |            |                  |       | Batch correction |       |      |                    |                | Aggregate score  |                  |       |
|--------------|------------------|------------|------------|------------------|-------|------------------|-------|------|--------------------|----------------|------------------|------------------|-------|
|              | Isolated labels  | KMeans NMI | KMeans ARI | Silhouette label | cLISI | Silhouette batch | iLISI | kBET | Graph connectivity | PCR comparison | Batch correction | Bio conservation | Total |
| scBIOT       | 0.73             | 0.75       | 0.67       | 0.66             | 1.00  | 0.90             | 0.30  | 0.29 | 0.83               | 0.83           | 0.63             | 0.76             | 0.71  |
| Harmony      | 0.74             | 0.68       | 0.59       | 0.65             | 1.00  | 0.85             | 0.32  | 0.39 | 0.58               | 0.59           | 0.55             | 0.73             | 0.66  |
| LIGER        | 0.71             | 0.67       | 0.49       | 0.65             | 1.00  | 0.93             | 0.36  | 0.49 | 0.95               | 0.18           | 0.58             | 0.70             | 0.65  |
| Unintegrated | 0.82             | 0.78       | 0.78       | 0.67             | 1.00  | 0.90             | 0.26  | 0.19 | 0.63               | 0.00           | 0.40             | 0.81             | 0.64  |

**Extended Data Fig. 2.** Quantitative comparison of biological conservation and batch-effect correction across iterative LSI (Unintegrated), LIGER, Harmony, and scBIOT for scATAC-seq brain dataset with large-window peaks<sup>1</sup>.

**Extended Data Fig. 3. a**, UMAP embeddings colored by batch and scBIOT-defined clusters in the SNARE-seq datasets. **b**, ARI and NMI scores comparing three integration methods across the datasets<sup>2</sup>.

## Extended Data Fig. 4

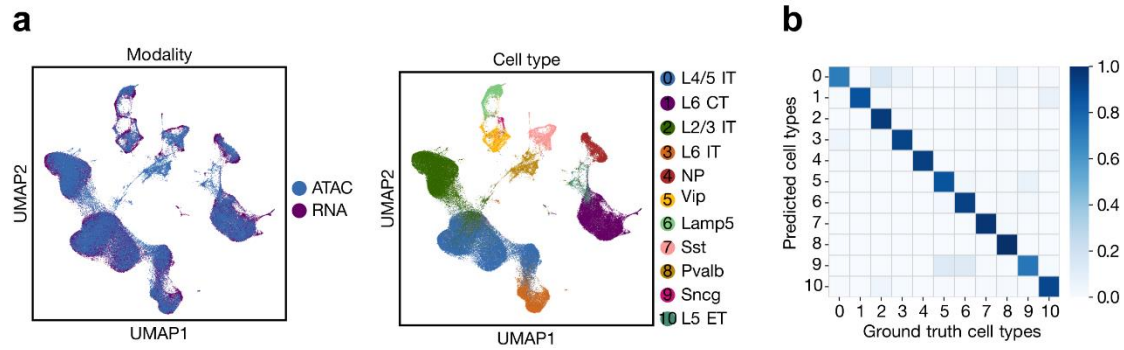

**Extended Data Fig. 4. a**, UMAP of the unpaired scRNA-seq and snATAC-seq datasets integrated with scBIOT, colored by batch (left) and by scBIOT-inferred clusters (right). **b**, Confusion matrix quantifying agreement between reference cell-type annotations and scBIOT-transferred labels from scRNA-seq to snATAC-seq<sup>3</sup>.

## Reference

1. Luecken, M. D. *et al.* Benchmarking atlas-level data integration in single-cell genomics. *Nat Methods* **19**, 41–50 (2022).
2. Chen, S., Lake, B. B. & Zhang, K. High-throughput sequencing of the transcriptome and chromatin accessibility in the same cell. *Nat Biotechnol* **37**, 1452–1457 (2019).
3. Yao, Z. *et al.* A transcriptomic and epigenomic cell atlas of the mouse primary motor cortex. *Nature* **598**, 103–110 (2021).

## Extended Methods

### Batch-aware optimal-transport (OT) integration with rare-type protection

#### Data and notation

Let  $X_0 \in R^{N \times d}$  be the baseline embedding (e.g., PCA, LSI). Each cell  $i$  has a batch label  $b_i \in \{1, \dots, B\}$ . The algorithm iteratively updates the embedding  $X^{(t)}$  and returns the best iterate  $X^*$ .

#### Reference and batch prototypes (rare-aware)

For a chosen reference mode (largest batch or union), we compute prototypes by MiniBatch  $k$ -means with sparsity weights:

$$w_i = \frac{\bar{d}_i}{\frac{1}{N} \sum_{j=1}^N \bar{d}_j}, \quad \bar{d}_i = \frac{1}{k} \sum_{j \in \mathcal{N}_k(i)} \|x_i - x_j\|_2, \quad (1)$$

Where  $\mathcal{N}_k(i)$  are  $k$ -nearest neighbors (kNN) in  $X^{(t)}$ .

#### Unbalanced entropic OT and barycentric projection

Between a batch prototype set ( $B_\ell$ ) and the reference ( $R$ ), we solve unbalanced entropic OT with squared-Euclidean cost:

$$C_{pq} = \frac{\|b_p - r_q\|_2^2}{\sigma_C^2}, \quad \sigma_C = \text{std}(C), \quad (2)$$

optionally clipping large entries to a chosen quantile to stabilize tails.

Let  $a \in \Delta^{K_{\text{batch}}-1}$  and  $b \in \Delta^{K_{\text{ref}}-1}$  be uniform masses. We compute a coupling  $T \in R_+^{K_{\text{batch}} \times K_{\text{ref}}}$  that minimizes

$$\mathcal{L}_{\text{UOT}}(T) = \langle C, T \rangle + \varepsilon KL(T \parallel \mathbf{1}) + \lambda KL(T\mathbf{1} \parallel a) + \lambda KL(T^\top \mathbf{1} \parallel b), \quad (3)$$

with entropic regularization  $\varepsilon$  (reg) and marginal relaxation  $\lambda$  (reg\_m). We use Sinkhorn scaling in log-space (GPU) with updates

$$K = e^{-C/\varepsilon}, \quad u^{(t+1)} = \left(\frac{a}{Kv^{(t)}}\right)^\tau, \quad v^{(t+1)} = \left(\frac{b}{K^\top u^{(t+1)}}\right)^\tau, \quad \tau = \frac{\lambda}{\lambda + \varepsilon}, \quad (4)$$

until convergence in  $\|\log u^{(t+1)} - \log u^{(t)}\|_\infty$  and  $\|\log v^{(t+1)} - \log v^{(t)}\|_\infty$ .

Each prototype  $b_p$  is projected to the reference via the OT barycenter:

$$\tilde{b}_p = \frac{\sum_q T_{pq} r_q}{\sum_q T_{pq}}. \quad (5)$$

### Prototype-to-cell displacement and bridge weighting

Cells inherit the prototype displacement with adaptive weights:

$$\Delta_p^{\text{proto}} = \tilde{b}_p - b_p, \quad s_p = \frac{1}{1 + \|\Delta_p^{\text{proto}}\|_2 / \sigma_\Delta}, \quad \alpha_i = s_{n(i)}(1 - 0.35 \beta_i), \quad (6)$$

where  $\sigma_\Delta = \text{std}(\|\Delta_p^{\text{proto}}\|_2)$  and  $\beta_i$  is the bridge score. The initial per-cell shift is

$$\mathbf{s}_i = \alpha_i \Delta_{n(i)}^{\text{proto}}. \quad (7)$$

### Bridge score from batch mixing and sparsity

Let  $p_{i,c}$  be the fraction of batch ( $c$ ) among the kNN of cell  $i$  in  $X^{(t)}$ . Define the neighbor batch entropy

$$H_i = - \sum_{c=1}^B p_{i,c} \log(p_{i,c} + 10^{-12}), \quad \hat{H}_i = \frac{H_i}{\log B}, \quad (8)$$

is combined with a normalized local sparsity score  $\hat{\rho}_i \in [0,1]$  (from Eq. 1) to form

$$\beta_i = 0.5 \hat{H}_i + 0.5 \hat{\rho}_i. \quad (9)$$

Larger  $\beta_i$  down-weights the move (update) near inter-batch bridges and in very sparse regions.

### Cluster-sharpening field

To encourage crisper clusters, we compute  $K$  pseudo-centers  $\{c_k\}$ . For each cell  $i$ , let  $c_1$  and  $c_2$  be the nearest and second-nearest centers with distances  $d_1 < d_2$ . Define a margin

$$m_i = \frac{d_2 - d_1}{\text{median}(d_2)}, \quad g_i = \frac{1}{1 + \exp((m_i - 1)/0.8)}, \quad (10)$$

and a sharpening displacement

$$\mathbf{q}_i = \text{pull}(c_1 - x_i) + g_i \text{push}(x_i - c_2). \quad (11)$$

The total proposed shift is

$$\tilde{\mathbf{s}}_i = \mathbf{s}_i + \gamma_{\text{sharp}} \mathbf{q}_i. \quad (12)$$

### Rare-aware kNN smoothing

On the fixed kNN graph of  $X_0$  with neighbor set  $\mathcal{N}_0(i)$ , we smooth shifts but skip rare cells (top 15% sparsest by  $\hat{\rho}_i$ ):

$$\tilde{\mathbf{s}}_i \leftarrow (1 - \lambda) \tilde{\mathbf{s}}_i + \lambda \frac{1}{|\mathcal{N}_0(i)|} \sum_{j \in \mathcal{N}_0(i)} \tilde{\mathbf{s}}_j. \quad (13)$$

### Step capping and edge-stretch guards

We cap each step size by the local baseline scale:

$$\mathbf{m}_i = \text{clip}\left(\eta \tilde{\mathbf{s}}_i, \|\cdot\|_2 \leq \kappa \bar{d}_i^{(0)}\right), \quad (14)$$

with  $\eta$  the global step (step\_lo  $\rightarrow$  step\_hi),  $\kappa = \text{max\_step\_local}$ , and  $\bar{d}_i^{(0)}$  from Eq. 1 computed in  $X_0$ .

To prevent graph over-stretch/compression relative to the original geometry, we enforce for all  $(i, j)$  edges of the kNN graph in  $X_0$ :

$$s_i^{\min} \leq \frac{\| (x_i + \mathbf{m}_i) - (x_j + \mathbf{m}_j) \|_2}{d_{ij}^{(0)}} \leq s_i^{\max}, \quad (15)$$

with  $s_i^{\min}, s_i^{\max}$  interpolated by  $\beta_i$  between bulk and bridge limits. If violated, moves are uniformly scaled to satisfy (15).

The candidate embedding is updated as

$$X^{\text{cand}} = X^{(t)} + M, \quad M = [\mathbf{m}_1, \dots, \mathbf{m}_N]^\top, \quad X^{(t+1)} = \text{PostScale}(X^{\text{cand}}; \mu_0, \sigma_0), \quad (16)$$

where  $()$  recenters and rescales each dimension to match  $(\mu_0, \sigma_0)$  of  $X_0$ .

### Metrics and selection objective

At each iteration we evaluate:

Batch-mixing (higher is better): mean neighbor-entropy

$$\text{mix}(X) = \frac{1}{N} \sum_{i=1}^N H_i(X), \quad (17)$$

computed as in Eq. 8 with neighbors in  $X$ .

Neighborhood overlap with the baseline (higher is better):

$$ovl(X_0, X) = \mathbb{E}_i \left[ \frac{|\mathcal{N}_k^{X_0}(i) \cap \mathcal{N}_k^X(i)|}{k} \right], \quad (18)$$

Graph strain (lower is better): mean squared relative change of edge lengths,

$$\text{str}(X) = E_{(i,j)} \left[ \left( \text{clip} \left( \frac{\|x_i - x_j\|_2}{d_{ij}^{(0)}} - 1, -c, c \right) \right)^2 \right]. \quad (19)$$

We select the best iterate by maximizing

$$J(X) = [\text{mix}(X) - \text{mix}(X_0)] + w_{\text{ovl}} ovl(X_0, X) - w_{\text{str}} [\text{str}(X) - \text{str}(X_0)] - \Gamma(X), \quad (20)$$

with soft overlap penalties

$$\Gamma(X) = \gamma [\max\{0, \underline{o}(t) - ovl\}]^2 + 0.45 \max\{0, \text{ovl}^* - ovl\}, \quad (21)$$

where  $\underline{o}(t)$  is an annealed floor,  $\text{ovl}^*$  is the best-so-far overlap, and  $\mathbf{w}_{\text{ovl}}$ ,  $\mathbf{w}_{\text{str}}$ ,  $\gamma$  correspond to `w_overlap`, `w_strain`, `penalty_gamma`. The best  $\mathbf{X}$  across iterations (patience-based early stopping) is returned.

### Trustworthiness

We also report trustworthiness  $TW$  on a subsample using the standard definition:

$$TW(k) = 1 - \frac{2}{nk(2n - 3k - 1)} \sum_{i=1}^n \sum_{j \in \mathcal{U}_k(i)} (r_{X_0}(i, j) - k), \quad (22)$$

where  $\mathcal{U}_k(i)$  are points that appear in the kNN of  $i$  in  $X$  but not in  $X_0$ ; and  $r_{X_0}(i, j)$  is one-based rank of  $j$  w.r.t.  $i$  in  $X_0$  (1 = nearest).

## Schedules and implementation

We linearly anneal  $\lambda$  (graph smoothing), the global step  $\eta$ , the cost-clipping quantile, and the overlap floor across at most  $T$  iterations (default  $T = 15$ ; `max_iter`). kNN uses FAISS on GPU when available; OT runs on GPU via the custom unbalanced Sinkhorn (`ot_backend="torch"`; POT fallback provided on CPU).

## Evaluation

We report the final iteration index, the metrics in Eqs. 17–19, and trustworthiness  $TW$  on a random subsample using the standard definition implemented in scikit-learn (`_trustworthiness_score`).

## Typical hyperparameters

$\varepsilon = 0.028$ ,  $\lambda/(\lambda + \varepsilon) = \tau = 0.40/(0.40 + 0.028)$ ,  $K_{ref} \leq 1024$ ,  $K_{batch} \leq 512$ ,  $pull = 0.78$ ,  $push = 0.34$ ; graph smoothing  $\lambda \in [0.38, 0.52]$  (annealed); step  $\eta \in [0.78, 0.96]$  (annealed); rare cutoff 85<sup>th</sup> percentile of  $\hat{\rho}_i$ ; guard limits  $s^{min} \in [0.72, 0.88]$ ,  $s^{max} \in [1.24, 1.65]$  (interpolated by  $\beta$ ).

## Prototype-aware objective for dual-view VAE clustering

We optimized dual-view VAEs augmented with prototype-aware clustering objectives. The models minimize the negative evidence lower bound (ELBO) for the  $\beta$ -VAE, extended with unsupervised and semi-supervised prototype losses that promote cluster consistency and separation.

### The basic VAE objective

We minimized the negative evidence lower bound (ELBO) for the  $\beta$ -VAE loss:

$$\mathcal{L}_{vae} = E_{q_{\theta}(z|x)}[-\log p_{\phi}(x|z)] + \beta \cdot D_{KL}(q_{\theta}(z|x)||p(z)), \quad (1)$$

where the first term is the reconstruction loss and the second term is the Kullback–Leibler (KL) divergence. For isotropic Gaussian priors, the KL term simplifies to a closed form.

### Prototype-aware contrastive learning

Let  $z_1, z_2 \in R^{B \times d}$  denote the embeddings of two complementary data views and  $\tilde{z} = z / \|z\|_2$  their normalized forms. A set of learnable prototypes  $\mathcal{C} = \{C_k\}_{k=1}^K$  defines latent cluster centers. The prototype temperature  $\tau$  controls the sharpness of cosine similarities. . For clustering we use the averaged embedding  $z_c = 1/2 (\text{flatten}(z_1) + \text{flatten}(z_2))$ .

#### *Cosine assignments*

$$\text{logits}_*(i, k) = \frac{\tilde{z}_*(i) \cdot \tilde{C}_k}{\tau}, \quad (2)$$

$$q_*(i) = \text{softmax}_k(\text{logits}_*(i, k)), \quad q(i) = \text{softmax}(\text{logits}(z_c(i))). \quad (3)$$

*Deep embedding clustering (DEC) sharpening*

$$f_k = \sum_i q(i, k), \quad p(i, k) = \frac{q(i, k)^2 / f_k}{\sum_j q(i, j)^2 / f_j}. \quad (4)$$

### Prototype losses

- 1) **DEC clustering.** Aligns predictions with sharpened targets.

$$\mathcal{L}_{\text{clust}} = KL(p \parallel \text{softmax}(\text{logits}(z_c))). \quad (5)$$

- 2) **Soft prototype pull.** Pulls embeddings toward prototypes using p-weights; ramp  $r_{\text{center}} = \min(1, \text{epoch}/8)$ .

$$\mathcal{L}_{\text{center}} = r_{\text{center}} \mathbb{E}_i \sum_k p(i, k) \parallel \tilde{z}_c(i) - \tilde{C}_k \parallel_2^2. \quad (6)$$

- 3) **Prototype repulsion.** Separates prototypes with a hinge on cosine similarity (target t).

$$\mathcal{L}_{\text{repulse}} = \mathbb{E}_{i \neq j} [\max\{0, \cos(\tilde{C}_i, \tilde{C}_j) - t\}]^2. \quad (7)$$

- 4) **CosFace margin on confident self-labels.** For samples with  $\max_k q(i, k) \geq \text{conf\_thr}$ , shift the target logit by m; ramp  $r_{\text{sup}} = \min(1, \text{epoch}/5)$ .

$$\mathcal{L}_{\text{margin}} = CE(\text{softmax}(\text{logits}^m), \hat{y}), \text{logits}^m(i, y) = \text{logits}(i, \hat{y}) - m. \quad (8)$$

- 5) **Label-smoothed supervised CE.** Apply to available pseudo-labels  $y_{\text{pseudo}} \geq 0$  with smoothing  $\epsilon$ .

$$\mathcal{L}_{\text{sup}} = CE_{\text{smoothed } \epsilon}(\text{logits}(z_c), y_{\text{pseudo}}). \quad (9)$$

6) **Cross-view assignment consistency.** Stabilizes assignments across views.

$$\mathcal{L}_{\text{cons}} = 1/2 [\text{KL}(q_1 \parallel q_2) + \text{KL}(q_2 \parallel q_1)]. \quad (10)$$

### Total objective

The full training objective is the sum of the VAE term and the prototype-aware terms:

$$\begin{aligned} \mathcal{L}_{\text{total}} = & \mathcal{L}_{\text{vae}} + \lambda_{\text{clust}} \mathcal{L}_{\text{clust}} + \lambda_{\text{center}} \mathcal{L}_{\text{center}} + \lambda_{\text{repulse}} \mathcal{L}_{\text{repulse}} + \\ & (r_{\text{sup}} \lambda_{\text{margin}}) \mathcal{L}_{\text{margin}} + (r_{\text{sup}} \lambda_{\text{sup}}) \mathcal{L}_{\text{sup}} + \lambda_{\text{cons}} \mathcal{L}_{\text{cons}}. \end{aligned} \quad (11)$$

### Hyperparameters

$\tau$  (proto\_tau),  $m$  (cosface\_m),  $t$  (repulse\_target), confidence threshold (conf\_thr), and label smoothing  $\varepsilon$  (label\_eps) govern the prototype dynamics. Weights  $\lambda^*$  correspond to the respective terms; prototypes are updated by exponential moving average with momentum proto\_ema\_m.
